# Supplementary material for: Assaying Paenibacillus alvei CsaB-Catalysed Ketalpyruvyltransfer to Saccharides by Measurement of Phosphate Release
Source: MDPI journal article supplement (doi:10.3390/biom11111732), 2021-11-20
Supplement: s1 [file s1]

## Supplementary Information

# Assaying *Paenibacillus alvei* CsaB-Catalysed Ketalpyruvyltransfer to Saccharides by Measurement of Phosphate Release

Fiona F. Hager-Mair<sup>1,‡</sup>, Cordula Stefanović<sup>1,‡</sup>, Charlie Lim<sup>2</sup>, Katharina Webhofer<sup>2</sup>, Simon Krauter<sup>2</sup>, Markus Blaukopf<sup>2</sup>, Roland Ludwig<sup>3</sup>, Paul Kosma<sup>2</sup>, and Christina Schäffer<sup>1,\*</sup>

<sup>1</sup> NanoGlycobiology Unit, Department of NanoBiotechnology, Universität für Bodenkultur Wien, 1190 Vienna, Austria; fiona.hager@boku.ac.at (F.F.H.-M.); cordula.stefanovic@boku.ac.at (C.S.); christina.schaeffer@boku.ac.at (Christina Schäffer)

<sup>2</sup> Department of Chemistry, Institute of Organic Chemistry, Universität für Bodenkultur Wien, 1190 Vienna, Austria; charlie.lim@boku.ac.at (C.L.); katharina.webhofer.20@ucl.ac.uk (K.W.); simon@krauter.at (S.K.); markus.blaukopf@boku.ac.at (M.B.), paul.kosma@boku.ac.at (P.K.)

<sup>3</sup> Biocatalysis and Biosensing Laboratory, Department of Food Science and Technology, Universität für Bodenkultur Wien, 1190 Vienna, Austria; roland.ludwig@boku.ac.at

\* Correspondence: christina.schaeffer@boku.ac.at; Tel.: +43-1-47654 (ext. 80203)

\* Correspondence: christina.schaeffer@boku.ac.at; Tel.: +43-1-47654 ext. 80203

‡ These authors contributed equally

## Supplementary Methods

### Chemical Synthesis of $\beta$ -D-ManNAc-(1 $\rightarrow$ 4)- $\beta$ -D-GlcNAc-1-OMe (3)

To synthesize  $\beta$ -D-ManNAc-(1 $\rightarrow$ 4)- $\beta$ -D-GlcNAc-1-OMe (3), methyl 2'-acetamido-3'-O-benzyl-4',6'-O-benzylidene-2'-deoxy- $\beta$ -D-mannopyranosyl-(1 $\rightarrow$ 4)-2-acetamido-3,6-di-O-benzyl-2-deoxy- $\beta$ -D-glucopyranoside **S1** (6 mg; 7  $\mu$ mol) - an intermediate from the synthesis of the [ $\rightarrow$ 4]- $\beta$ -D-GlcNAc-(1 $\rightarrow$ 3)-4,6-Pyr- $\beta$ -D-ManNAc-(1 $\rightarrow$ ) repeat of the *P. alvei* CWGP [1] - was dissolved in dry MeOH (1.5 ml), a catalytic amount of Pd/C was added, and the suspension was flushed with argon. The flask was evacuated, flushed with Ar four times, evacuated again, and set under H<sub>2</sub>-atmosphere. After 5.25 h of reaction time, the catalyst was filtered over Celite® and washed with MeOH several times (15 ml in total). The filtrate was concentrated *in vacuo* to give a crude residue (~4 mg). NMR analysis showed a mixture of (3) and the benzylidene-protected intermediate (Scheme S1). Therefore, the reaction was repeated overnight, finally yielding 3 mg (91%) of (3) as an amorphous solid.

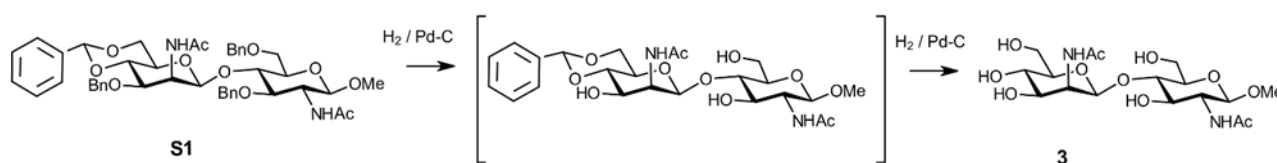

**Scheme S1.** Synthesis of  $\beta$ -D-ManNAc-(1 $\rightarrow$ 4)- $\beta$ -D-GlcNAc-1-OMe (3).

1. Krauter, S.; Schäffer, C.; Kosma, P. Synthesis of a pyruvylated *N*-acetyl- $\beta$ -D-mannosamine containing disaccharide repeating unit of a cell wall glycopolymer from *Paenibacillus alvei* *Arkivoc* **2021**, 137-151. doi:10.24820/ark.5550190.p011.358

## Supplementary Figure S1

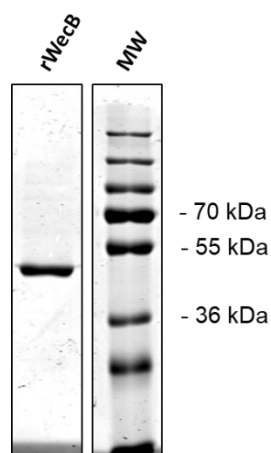

**Figure S1.** SDS-PAGE analysis of purified, recombinant UDP-GlcNAc-2-epimerase WecB (5  $\mu$ g; calculated molecular weight, 42.2 kDa) from *E. coli* run on a 10% SDS-PAGE gel and visualized with Coomassie Brilliant Blue G250 staining (rWecB). Molecular weight standard (MW), PageRuler Prestained Plus Protein Ladder (ThermoFisher).

## Supplementary Table S1

**Table S1.**  $^1\text{H}$  and  $^{13}\text{C}$  chemical shifts ( $\delta$ , ppm) and in parentheses  $J$  couplings (Hz) for  $\beta$ -D-ManNAc-(1 $\rightarrow$ 4)- $\beta$ -D-GlcNAc-1-OMe (3).

| Sugar residue      | $\beta$ -D-ManNAc-(1 $\rightarrow$      | $\rightarrow$ 4)- $\beta$ -D-GlcNAc-1-OMe  |
|--------------------|-----------------------------------------|--------------------------------------------|
| H1                 | 4.88 (1.6)                              | 4.42 (8.0)                                 |
| C1                 | 99.41                                   | 101.94                                     |
| H2                 | 4.54 (1.6, 4.6)                         | ~3.70 (n.d.)                               |
| C2                 | 53.24                                   | 55.16                                      |
| H3                 | 3.81 (4.4, 9.7)                         | ~3.70 (n.d.)                               |
| C3                 | 71.96                                   | 72.47                                      |
| H4                 | ~3.50 (n.d.)                            | ~3.70 (n.d.)                               |
| C4                 | 66.62                                   | 78.87                                      |
| H5                 | ~3.50 (n.d.)                            | 3.43 (2.7, 5.0, 9.9)                       |
| C5                 | 74.52                                   | 76.53                                      |
| H6                 | a: 3.87 (2.4, 12.3)<br>b: ~ 3.70 (n.d.) | a: 3.89 (2.3, 12.6)<br>b: 3.79 (5.3, 12.2) |
| C6                 | 60.18                                   | 60.41                                      |
| NCOCH <sub>3</sub> | 2.05 or 2.02                            | 2.05 or 2.02                               |
| NCOCH <sub>3</sub> | 22.21 or 22.01                          | 22.21 or 22.01                             |
| NCOCH <sub>3</sub> | 175.47 or 174.76                        | 175.47 or 174.76                           |
| OCH <sub>3</sub>   |                                         | 3.48                                       |
| OCH <sub>3</sub>   |                                         | 57.14                                      |
